# Supplementary material for: Discovery of processive catalysis by an exo-hydrolase with a pocket-shaped active site
Source: PubMed Central journal article supplement (PMC6527550; doi:10.1038/s41467-019-09691-z), 2019-05-20
Supplement: 41467_2019_9691_MOESM1_ESM.pdf [file 41467_2019_9691_MOESM1_ESM.pdf]

## Supplementary Information

### Discovery of processive catalysis by an exo-hydrolase with a pocket-shaped active site

**Victor A. Streltsov<sup>1,15</sup>, Sukanya Luang<sup>2,15</sup>, Alys Peisley<sup>1</sup>, Joseph N. Varghese<sup>1</sup>, James R. Ketudat Cairns<sup>3</sup>, Sebastien Fort<sup>4</sup>, Marcel Hijnen<sup>5</sup>, Igor Tvaroška<sup>6</sup>, Ana Ardá<sup>7</sup>, Jesús Jiménez-Barbero<sup>7</sup>, Mercedes Alfonso-Prieto<sup>8</sup>, Carme Rovira<sup>8,9</sup>, Fernanda Mendoza<sup>10,11</sup>, Laura Tiessler-Sala<sup>11</sup>, José-Emilio Sánchez-Aparicio<sup>11</sup>, Jaime Rodríguez-Guerra<sup>11,12</sup>, José M. Lluch<sup>11,13</sup>, Jean-Didier Maréchal<sup>11</sup>, Laura Masgrau<sup>11,13</sup>, and Maria Hrmova<sup>2,14</sup>**

<sup>1</sup>Commonwealth Scientific and Industrial Research Organisation, Materials Science and Engineering, Parkville Victoria 3052, Australia. <sup>2</sup>School of Agriculture, Food and Wine, University of Adelaide, Waite Campus, Glen Osmond South Australia 5064, Australia. <sup>3</sup>School of Chemistry and Center for Biomolecular Structure, Function and Application, Suranaree University of Technology, 30000 Nakhon Ratchasima, Thailand. <sup>4</sup>University Grenoble Alpes, Centre de Recherches sur les Macromolécules Végétales, 38041 Grenoble cedex 9, France. <sup>5</sup>GE Healthcare Life Sciences, Paramatta NSW 2150, Australia. <sup>6</sup>Institute of Chemistry, Slovak Academy of Sciences, 84538 Bratislava, Slovak Republic. <sup>7</sup>Centre for Cooperative Research in Biosciences, 48160 Derio-Bizkaia, Spain. <sup>8</sup>Departament de Química Inorgànica i Orgànica, Universitat de Barcelona, 08028 Barcelona, Spain. <sup>9</sup>Institució Catalana de Recerca i Estudis Avançats, 08010 Barcelona, Spain. <sup>10</sup>Departamento de Ciencias Químicas, Universidad Andres Bello, Sede Concepción, 4260000 Talcahuano, Chile. <sup>11</sup>Departament de Química, Universitat Autònoma de Barcelona, 08193 Bellaterra, Spain. <sup>12</sup>Institute of Chemical Research of Catalonia, The Barcelona Institute of Science and Technology, 43007 Tarragona, Spain. <sup>13</sup>Institut de Biotecnologia i de Biomedicina, Universitat Autònoma de Barcelona, 08193 Bellaterra, Spain. <sup>14</sup>School of Life Sciences, Huaiyin Normal University, 223300 Huaian, China.

<sup>15</sup>These authors contributed equally: Victor A. Streltsov and Sukanya Luang.

Correspondence and requests for materials should be addressed to M.H. (email: maria.hrmova@adelaide.edu.au)

## Supplementary Note 1

**In-solution NMR spectroscopy of thiocellobiose binding to recombinant HvExoI.** To confirm our observations of Glc binding (Fig. 4b; top panel), thiocellobiose that is not hydrolysed by HvExoI<sup>1</sup>, was added in an excess relative to the enzyme. Here, clear negative NOEs between specific thiocellobiose proton pairs were observed (Supplementary Fig. 4). A NOESY spectrum of free thiocellobiose was also acquired under the same conditions, which showed the presence of COSY-like cross-peaks that arose from zero quantum coherences (ZQCs), and not from dipolar interactions (NOE). This implied that free thiocellobiose tumbled with a rotational correlation time corresponding to a zero value for NOE. Thus, negative NOEs observed for thiocellobiose bound to HvExoI that were assigned as trNOEs, arose exclusively from bound thiocellobiose. Specifically, strong trNOEs of the anomeric proton of the non-reducing Glc (H-1') with the intra-residual H-3' and H-5' were observed (Fig. 4b; bottom panel), indicating that the non-reducing glucopyranose ring of thiocellobiose was bound in the <sup>4</sup>C<sub>1</sub> conformation. In fact, the β-anomeric proton of thiocellobiose at the reducing-end (H1β) also showed strong intra-residual trNOEs to H3 and H5, as expected for the <sup>4</sup>C<sub>1</sub> conformation (Fig. 4b; bottom panel). The comparisons of NOEs between free and bound thiocellobiose (Supplementary Fig. 4) suggested that HvExoI adopted a conformational selection process for a thioglycosidic linkage. While in a free form, thiocellobiose exists in an ensemble of three diverse conformers, as deduced from the observation of the exclusive inter-residual NOEs H1'-H4 (syn), H1'-H-3 (anti-Psi) and H2'-H4 (anti-Phi)<sup>2</sup>, in the trNOESY spectrum, the only strong trNOEs were those of inter-residual H1'-H4. Consequently, the data indicate that HvExoI selects a syn conformer from the available conformational distribution of thiocellobiose conformers.

## Supplementary Note 2

**G6SG-OMe binds across the active site of recombinant HvExoI.** The reducing-end Glc moiety of G6SG-OMe aligned with the indole ring of Trp286 and Trp434 such that the intra-ring oxygen of the reducing-end Glc moiety (hydrophilic face) faced Trp286, while that of the non-reducing-end moiety (hydrophobic face) pointed to Trp434. The loop carrying Glu491 to Asn498 adopted a new position, compared to that in ligand-free recombinant HvExoI. This productive binding of G6SG-OMe was emphasised by the presence of the hydrogen bond (H-bond) of 2.7 Å formed between C2-OH of non-reducing Glc and Oδ2 of Asp285 (catalytic nucleophile), and by the water-mediated contact formed between Oε2 of Glu491 (acid/base) and S1 of G6SG-OMe.

### Supplementary Note 3

**Reciprocal docking of  $\beta$ -D-glucopyranosyl-(1,2)-D-glucose (G2OG) or Glc to obtain ternary HvExoI:Glc:G2OG complexes.** G2OG or Glc was docked in the HvExoI:Glc complex to obtain ternary HvExoI:Glc:G2O complexes 1 and 2, which we considered to be structural intermediates during the Glc displacement route. To obtain complex 1, Glc was docked in the -1 subsite of the HvExoI:G2OG complex, derived from the crystal structure of HvExoI in complex with G2SG-OMe (PDB 6MD6). The lowest-energy solution (score of 65) was used as a starting point for 100 ns of the MD simulation (Supplementary Fig. 5). In this complex (Supplementary Fig. 6; left-top panel), G2OG after 50 ns abandoned its original binding position and bound with the non-reducing-end in the +1 subsite, while the sidechain of Tyr253, that in the HvExoI:G2SG-OMe complex (PDB 6MD6) forms the H-bond with the carbonyl O-atom of the Trp286 backbone, rotated to expose a large cavity next to the -1 subsite (Supplementary Fig. 6; left-bottom panel). To obtain complex 2, docking of G2OG was performed on the HvExoI:Glc complex (PDB 3WLH). In the docking solutions, G2OG bound with the non-reducing glucosyl moiety in the +1 subsite, while the reducing moiety remained solvent exposed at the putative +2 subsite (score 58) (Supplementary Fig. 6; right-top panel). In this stable complex after 90 ns of MD simulations (Supplementary Fig. 5), Tyr253 changed its conformation, although to the other side compared to that in complex 1, making the exposed lateral cavity next to the -1 subsite shallower (Supplementary Fig. 6; right-bottom panel).

### Supplementary Note 4

**Exploration of alternative binding sites by MD simulations and docking.** We reasoned that incoming substrates could potentially bind to different sites than those at the +1 and putative +2 subsites, described in complexes 1 and 2 above, and to trigger Glc displacement from the -1 subsite through the +1 subsite, which could only then be occupied by a new substrate. To investigate this possibility, MD simulations of binary HvExoI:Glc complexes revealed that Glc stayed bound in the active site for the entire 200 ns simulation time (Supplementary Fig. 5), while Trp434 changed its conformation that affected the space available in the +1 subsite (Supplementary Fig. 7b, d). Most of the time (>75%) Trp434 tilted perpendicularly with respect to Trp286 that barely moved along simulations, and partially blocked the space assigned to Glc' (PDB 3WLH), or to Glc2 in recombinant HvExoI perfused with Glc (PDB 3WLO) (Supplementary Fig. 7b, d; Fig. 3). The CA-CB-CG-CD1 dihedral angle of Trp434 at approximately  $-50^\circ$  indicated the closed conformation of Trp434, which could establish various interactions. One of most stable ones was the H-bond between HE2 of Trp434 and O6 of Glc, formed 15 ns from the simulation onset that was retained for 100 ns. The second, a minor conformation observed for Trp434 with the CA-CB-CG-CD1 dihedral angle of

around 50° (Supplementary Fig. 7c, e), corresponded to that seen in the crystal structure (PDB 3WLH), with the indole ring parallel to that of Trp286 and HE2 of Trp434 interacting with the catalytic acid/base Glu491 (Supplementary Fig. 7c, e). Next, docking of G2OG and  $\beta$ -D-glucopyranosyl-(1,3)-D-glucose (G3OG) (Supplementary Fig. 6, 8, complexes 3-6) performed on the MD simulation snapshot described above (Supplementary Fig. 7b, d) aimed to shed light on identifying substrate binding sites other than those of the +1 and putative +2 subsites. These docking solutions described below, identified a solvent-exposed lateral cavity for potential substrate binding (Supplementary Fig. 6, 8).

**Complex 3:** This complex presents an open and the most frequent solvent exposed conformation of Trp434, providing this residue was set to be flexible during docking calculations. G3OG bound (score 68) with its non-reducing-end in the lateral cavity and the reducing-end in the +1 subsite (Supplementary Fig. 8; left-top panel). However, within first 4 ns of the MD simulation, G3OG positioned its non-reducing-end in the +1 subsite and interacted with solvent exposed Trp434. After around 40 ns, Trp434 changed its conformation to that observed in the native structure with trapped Glc (PDB 3WLH), while G3OG bound with its non-reducing-end in the +1 subsite and the reducing-end solvent exposed, as seen in the structure with G2SG-OMe (PDB 6MD6) (Supplementary Fig. 8; left-middle panel). After around 2 ns, Tyr253 changed its conformation to that observed in complex 1. These re-arrangements remained stable up to 125 ns of the simulation (Supplementary Fig. 8; left-bottom panel).

**Complex 4:** As Trp434 was set to be rigid, the docking solution found Trp434 occupying the +1 subsite and G2OG bound (score 67) in the lateral cavity (Supplementary Fig. 8; right-top panel). However, during equilibration G2OG abandoned this lateral cavity and remained bound at the protein surface near Trp434, which blocked the +1 subsite, and for 100 ns interacted with Glu36 (Supplementary Fig. 8; right-middle panel). After 104 ns Trp434 changed its conformation to that observed in crystal structures, while G2OG entered the +1 subsite with its non-reducing-end first adopting a binding mode analogous to that observed in the crystal structure with G2SG-OMe (PDB 6MD6), and the Tyr253 sidechain rotated as seen in complexes 1 and 3. This system remained stable up to 150 ns of the simulation run (Supplementary Fig. 8; right-bottom panel).

**Complex 5:** The Trp434 sidechain presents an open and solvent exposed conformation. This docking solution (score 64) was selected as G2OG bound next to the lateral cavity, thus leaving the +1 subsite unoccupied, so that it could be used as the potential displacement route. However, this was not a stable binding mode of G2OG, which during the first 10 ns of simulation was translated into the +1 subsite and subsequently rapidly moved into the solvent (Supplementary Fig. 5). Trp434

ended up blocking the +1 subsite, as it was seen during HvExoI:Glc simulations (Supplementary Fig. 7b, d).

Complex 6: Although Trp434 could change its conformation in this complex, which is one of the lowest energy solutions (score 75), Trp434 partially blocked the +1 subsite. G3OG bound initially to the lateral cavity, however further progression of MD simulations revealed that this was not a stable binding mode, as G3OG moved away in less than 10 ns (Supplementary Fig. 5). Trp434 remained blocking the +1 subsite for the next 40 ns of the MD simulation run.

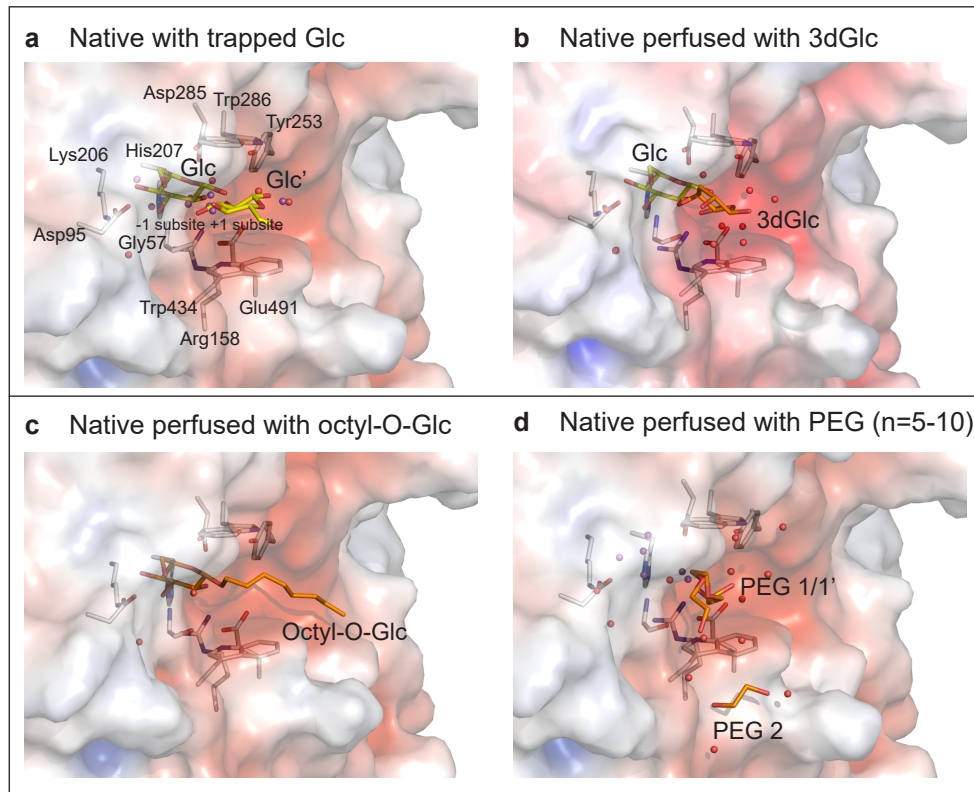

**Supplementary Figure 1. Native HvExoI with trapped Glc, and with perfused 3dGlc, octyl-O-Glc or PEG (n=5-10).**

**a**, Native HvExoI with trapped Glc. The Glc molecule (Glc and Glc', carbons: yellow sticks) at 0.5 occupancy oscillates between the -1 and +1 subsites. **b**, Native HvExoI perfused with 3dGlc. Glc (carbons: yellow sticks) and 3dGlc (carbons: orange sticks) at 1.0 occupancies are bound in -1 and +1 subsites. **c**, Native HvExoI perfused with octyl-O-Glc. Octyl-O-Glc (carbons: orange sticks) at 1.0 occupancy is bound across -1 and +1 subsites. **d**, Native HvExoI perfused with PEG (n=5-10). Two PEG molecules (PEG 1 in alternate conformations at occupancies 0.5, PEG 2 at occupancy 1.0) (carbons: orange sticks) are bound at the +1 and putative +2 subsites. Molecular surface morphologies are coloured by electrostatic potentials: white, neutral; blue, +5  $kT \cdot e^{-1}$ ; red, -5  $kT \cdot e^{-1}$ . Grey, red, and blue represent carbon, oxygen and nitrogen atoms, respectively. Water molecules are shown as red or magenta (alternate water molecules) spheres in complexes with Glc and PEG molecules. Residues are marked in top left panel only.

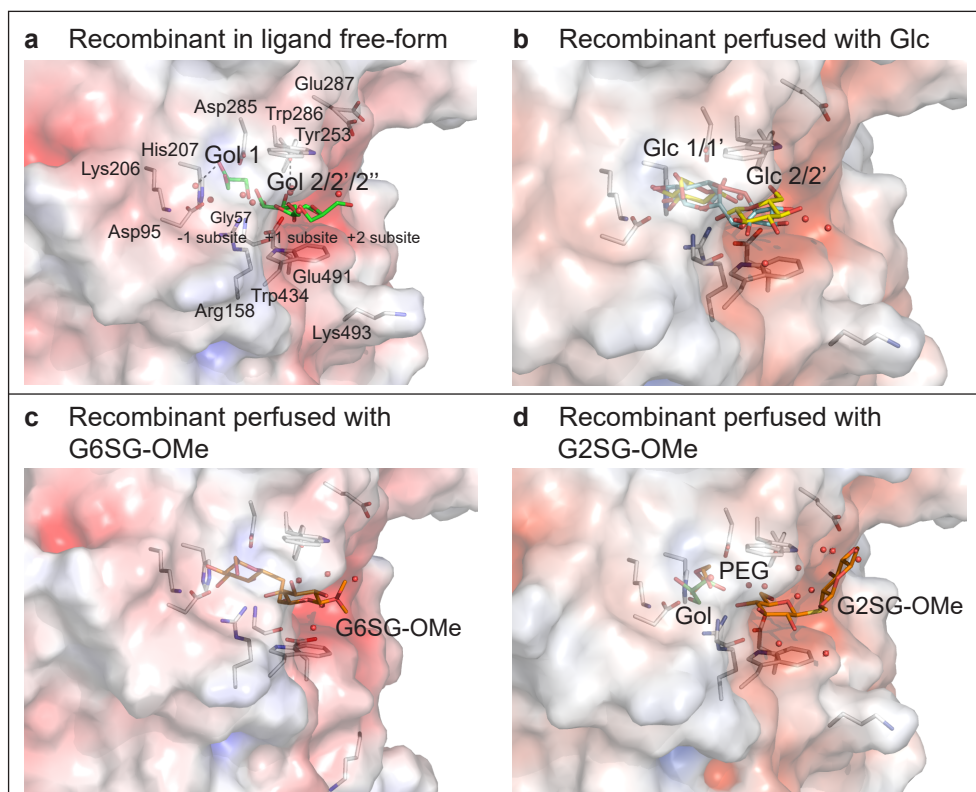

**Supplementary Figure 2. Recombinant HvExoI in a ligand free-form, and with perfused Glc, G6SG-OMe or G2SG-OMe.**

**a**, Ligand-free recombinant HvExoI. Two glycerol molecules (carbons: green sticks) (Gol 1 and Gol 2 in three alternate positions at occupancy 0.5) are in the -1 and +1 subsites. **b**, Recombinant HvExoI perfused with Glc. Two Glc molecules at 0.8 ( ${}^4C_1$ ) (carbons: yellow sticks) and 0.2 ( ${}^1S_3$ ) (carbons: cyan sticks) occupancies are shown in the -1 and +1 subsites, respectively. **c**, Recombinant HvExoI perfused with G6SG-OMe. G6SG-OMe (carbons: orange sticks) at 1.0 occupancy is bound across the -1 and +1 subsites. **d**, Recombinant HvExoI perfused with G2SG-OMe. G2SG-OMe (carbons: orange sticks) at 0.7 occupancy is bound across the +1 and putative +2 subsites. Glycerol (carbons: green sticks) and PEG (carbons: orange sticks) molecules fill-in the -1 subsite. Water molecules are shown as red spheres. Molecular surface morphologies are coloured by electrostatic potentials: white, neutral; blue,  $+5 \text{ kT}\cdot\text{e}^{-1}$ ; red,  $-5 \text{ kT}\cdot\text{e}^{-1}$ . Grey, red, and blue represent carbon, oxygen and nitrogen atoms, respectively. Water molecules are shown as red spheres. Residues are marked in top left panel only.

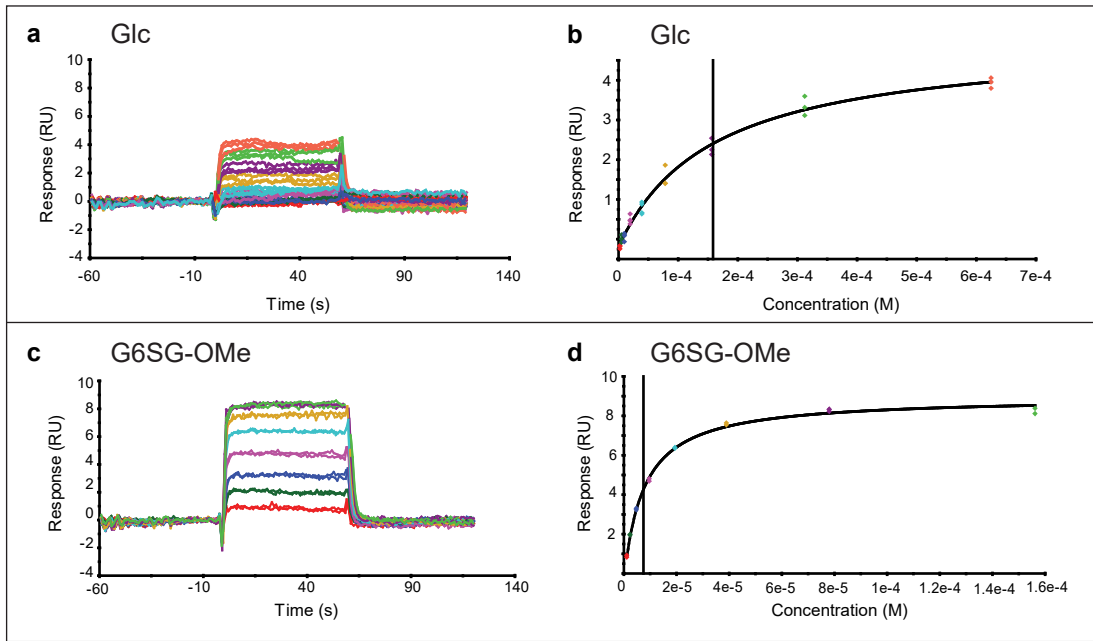

**Supplementary Figure 3. SPR analyses of G6SG-OMe or Glc binding to recombinant HvExoI.**

Sensograms of binding for **a**, Glc, and **c**, for G6SG-OMe. Steady state affinity binding curves for **b**, Glc, and **d**, for G6SG-OMe. Derived  $K_D$  values are  $0.16 \times 10^{-3}$  M for Glc and  $0.008 \times 10^{-3}$  M for G6SG-OMe. Triplicate experiments were performed in each case.



**a** A complete trNOESY spectrum of recombinant HvExol, Glc and thiocellobiose, 283 K, 800 MHz

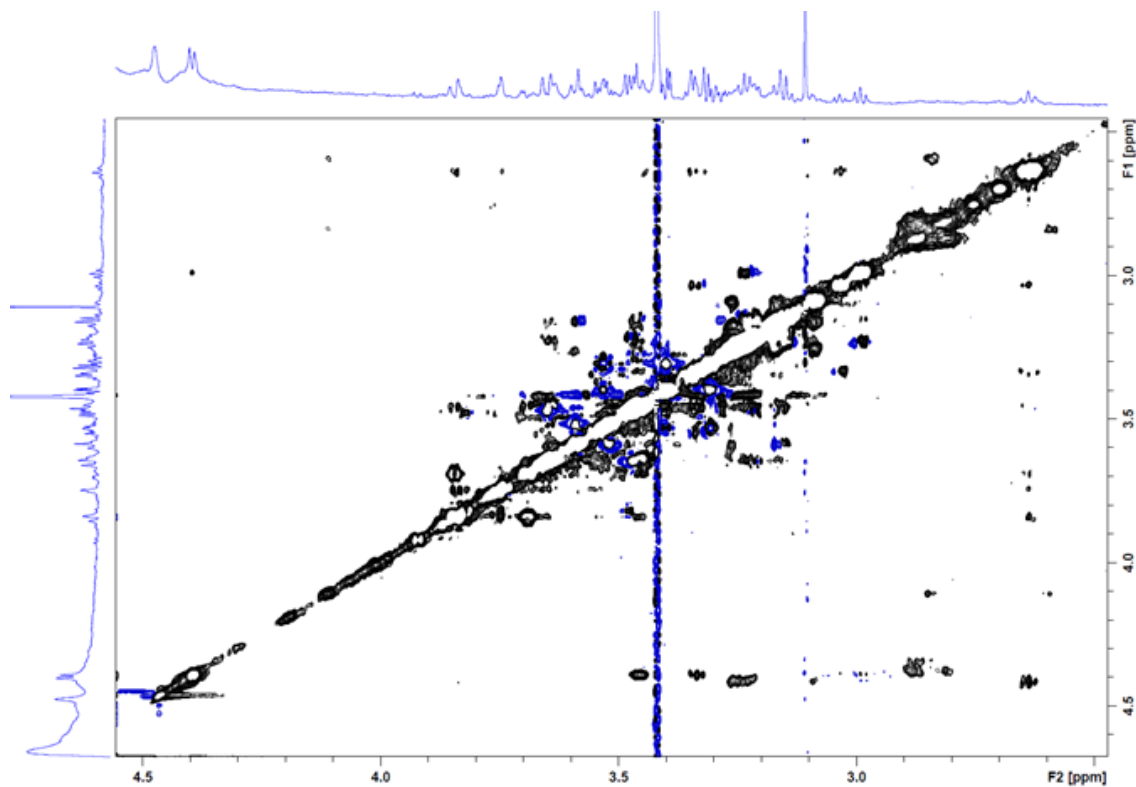

**b** NOESY, free thiocellobiose, 313 K, 800 MHz

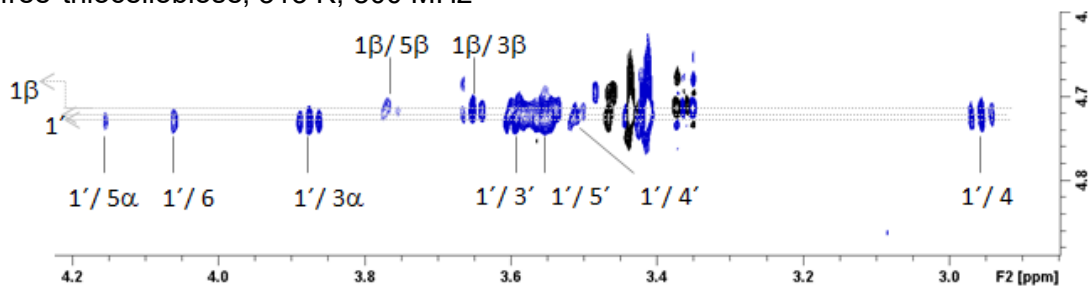

**c** trNOESY, thiocellobiose diffused in recombinant HvExol, 283 K, 800 MHz

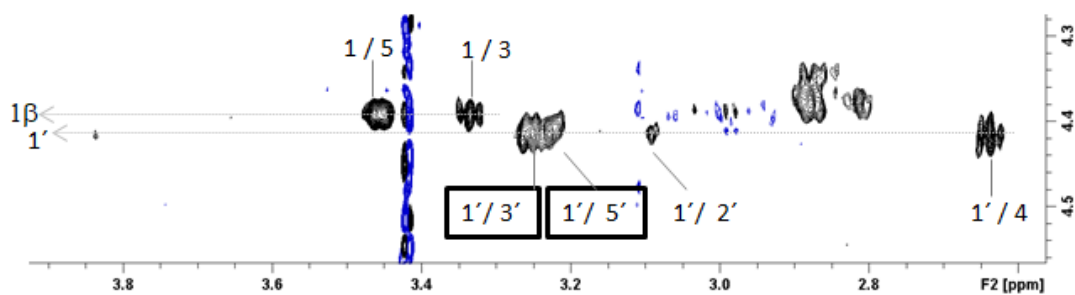

**d**

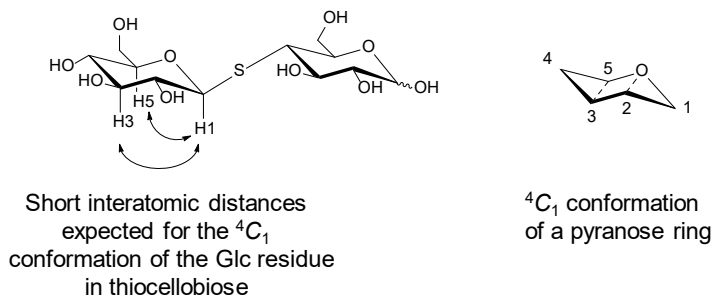

**Supplementary Figure 4. Recombinant HvExoI binds thiocellobiose in the  ${}^4C_1$  conformation at the -1 subsite without distortion of a pyranose ring.**

**a**, Complete trNOESY spectrum of 0.057 mM recombinant HvExoI incubated with 0.285 mM Glc and 0.17 mM thiocellobiose was acquired with 300 msec mixing time at 283 K and 800 MHz. **b**, NOESY spectrum of free thiocellobiose with 600 msec mixing time was acquired at 313 K and 800 MHz. Cross-peaks correspond to positive NOEs. **c**, Enlargement of the trNOESY spectrum (panel a) in the same region as in panel b. Key negative trNOEs defining the  ${}^4C_1$  conformation of bound thiocellobiose are annotated in squares. Blue lines in a and c refer to residual noise signals. **d**, Left: short interproton distances in the Glc residue of thiocellobiose (arrows), which adopts the  ${}^4C_1$  conformation produce NOE and trNOE effects. Right: a pyranose ring with the co-planar C2-C3-C5-O atoms in the  ${}^4C_1$  conformation.

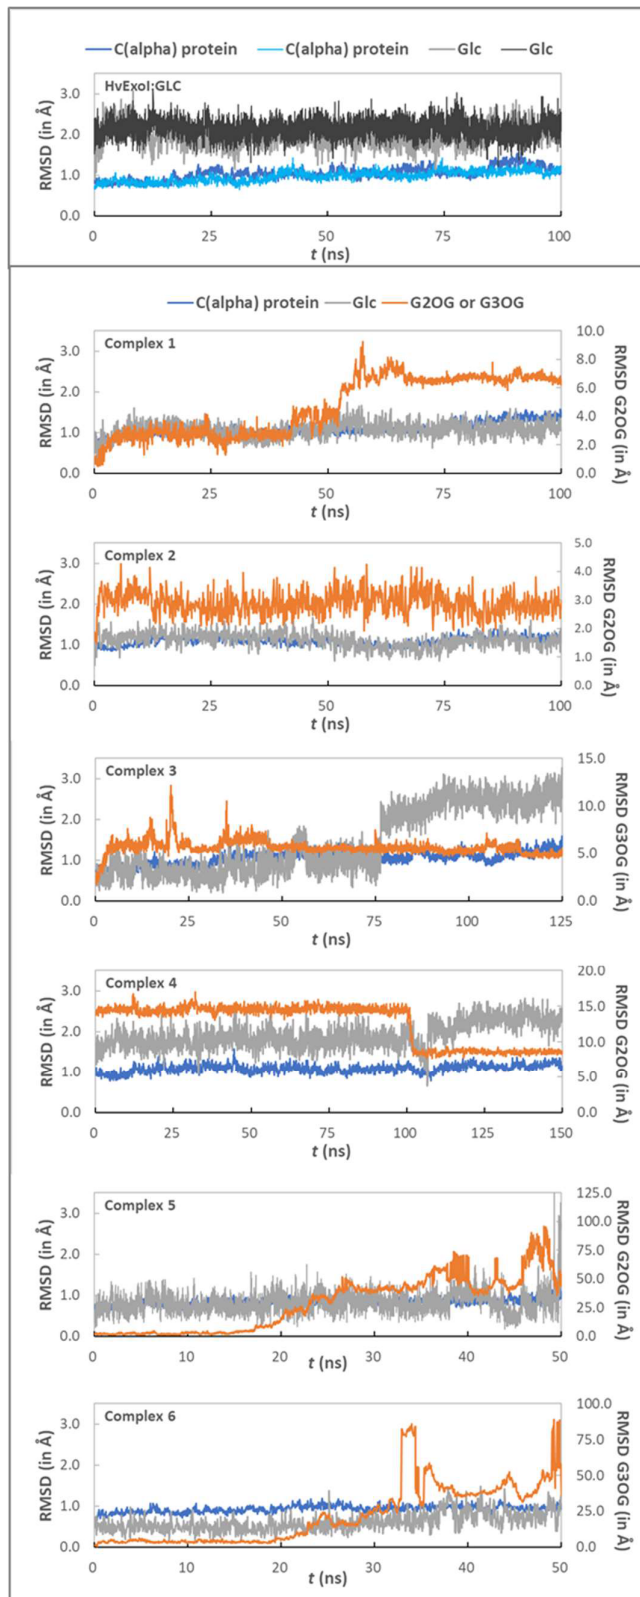

**Supplementary Figure 5. Root-mean-square deviation (RMSD) values (Å) for C $\alpha$  carbon atoms and ligands along MD simulations of HvExoI complexes.**

RMSD values are specified for the HvExoI:Glc complex (top panel) or for HvExoI:Glc:G2OG (complexes 1-2 and 4-5) and HvExoI:Glc:G3OG (complexes 3 and 6) complexes, generated by docking.

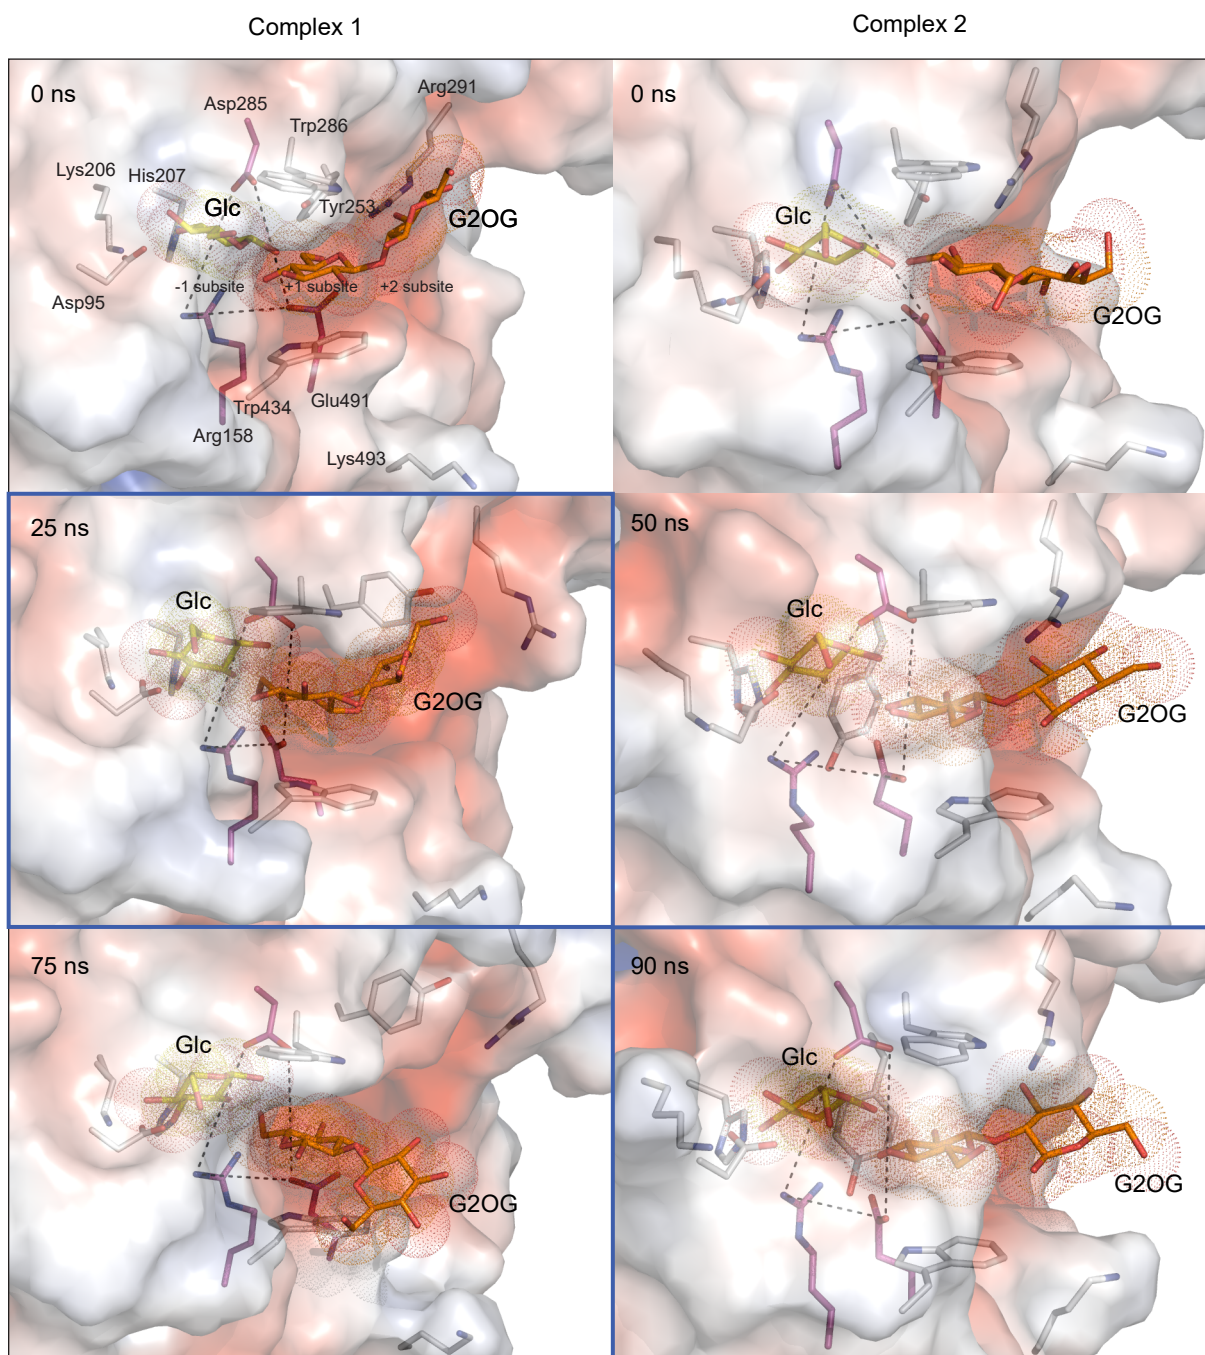

**Supplementary Figure 6. Ternary HvExoI:Glc:G2OG complexes 1 (left) and 2 (right) along MD simulations after docking.**

Selected residues (carbons: grey sticks), Glc in the -1 subsite (carbons: yellow sticks) and G2OG (carbons: orange sticks) are shown. Glc and G2OG molecules are presented with dots indicating van der Waals radii. Molecular surface morphologies are coloured by electrostatic potentials: white, neutral; blue,  $+5 \text{ kT} \cdot e^{-1}$ ; red,  $-5 \text{ kT} \cdot e^{-1}$ . Frames highlighted in blue were used for PELE calculations to investigate the Glc displacement pathway. Structures in top to bottom panels were superposed with RMSD values between 0.769 and 0.859 Å (complex 1), and 0.813 and 1.287 Å (complex 2). Arg158-Glu491-Asp285 (carbons: purple sticks) toll-like barriers (dashed lines) are shown. Residues are marked in top left panel only.

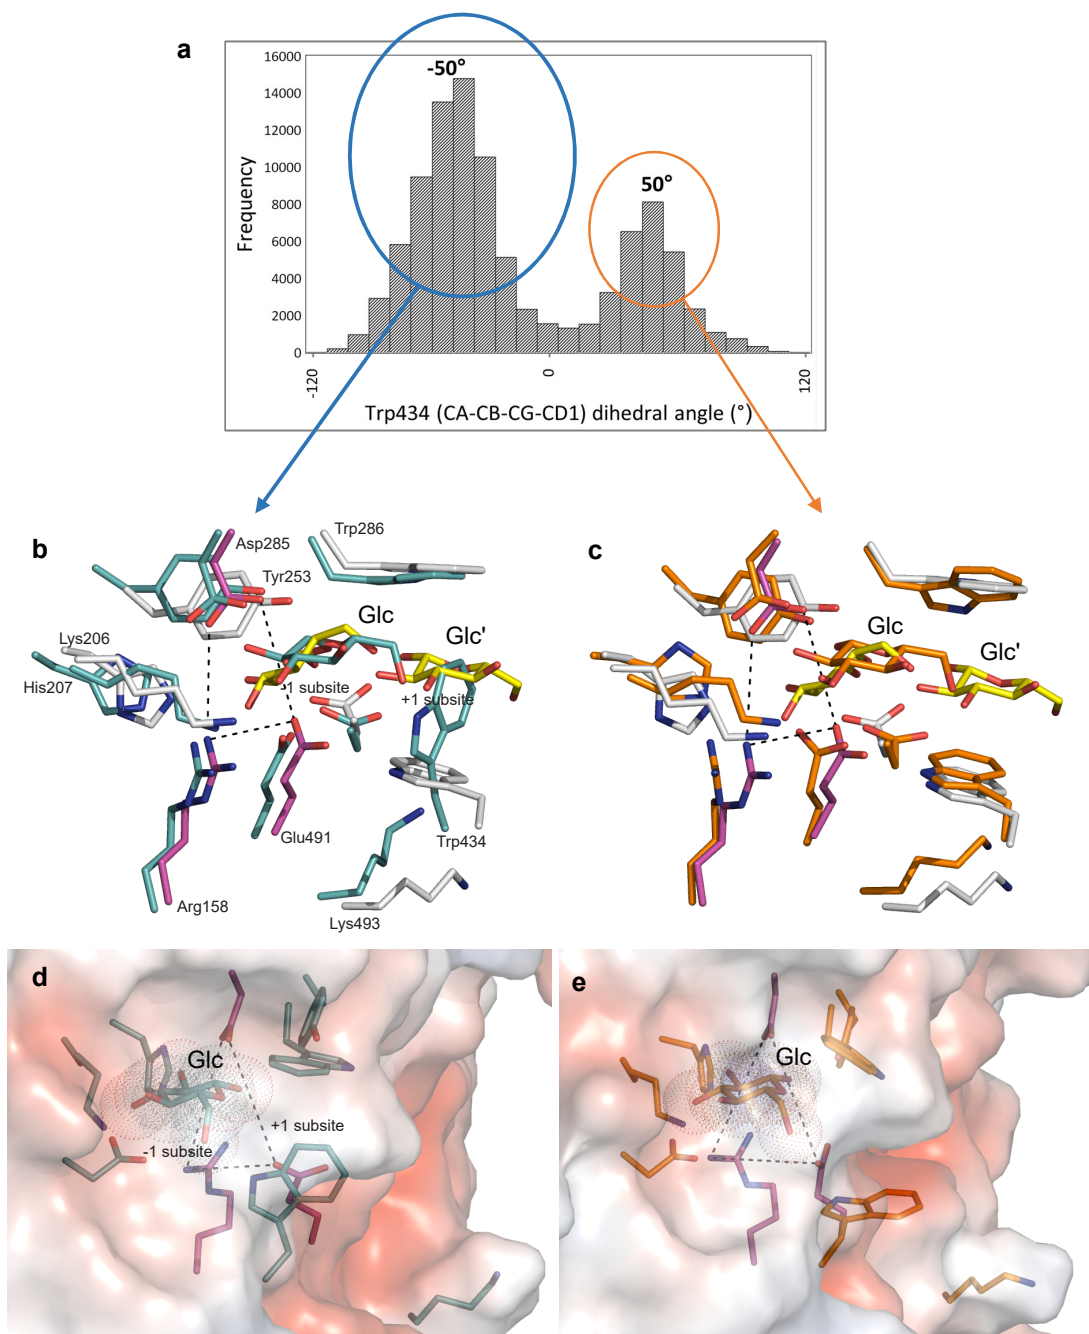

### Supplementary Figure 7. MD simulations of the binary HvExoI:Glc complex.

**a**, Distribution of CA-CB-CG-CD1 dihedral angles of Trp434 show a major orientation at around  $-50^\circ$ , and a second less-populated angle at around  $50^\circ$ . **b**, Active site residues are shown in the major orientation with Glc (carbons or residues and Glc: steel sticks), and **c**, in the minor orientation with Glc (carbons or residues and Glc: orange sticks), superposed on native HvExoI (PDB 3WLH; carbons of residues and Glc: grey and yellow sticks) with RMSD values of  $0.96 \text{ \AA}$  (**b**), and  $0.94 \text{ \AA}$  (**c**). **d-e**, same as **b**, **c** but with protein surface representations of binary HvExoI:Glc complexes coloured by electrostatic potentials: white, neutral; blue,  $+5 \text{ kT} \cdot e^{-1}$ ; red,  $-5 \text{ kT} \cdot e^{-1}$ . Glc molecules are presented with dots indicating van der Waals radii. Left (**b-d**) and right (**c-e**) images are rotated by around  $250^\circ$  along y-axes. Arg158-Glu491-Asp285 (carbons: purple sticks) toll-like barriers (dashed lines) are shown in **c-e**. Residues are marked in **b** panel only.

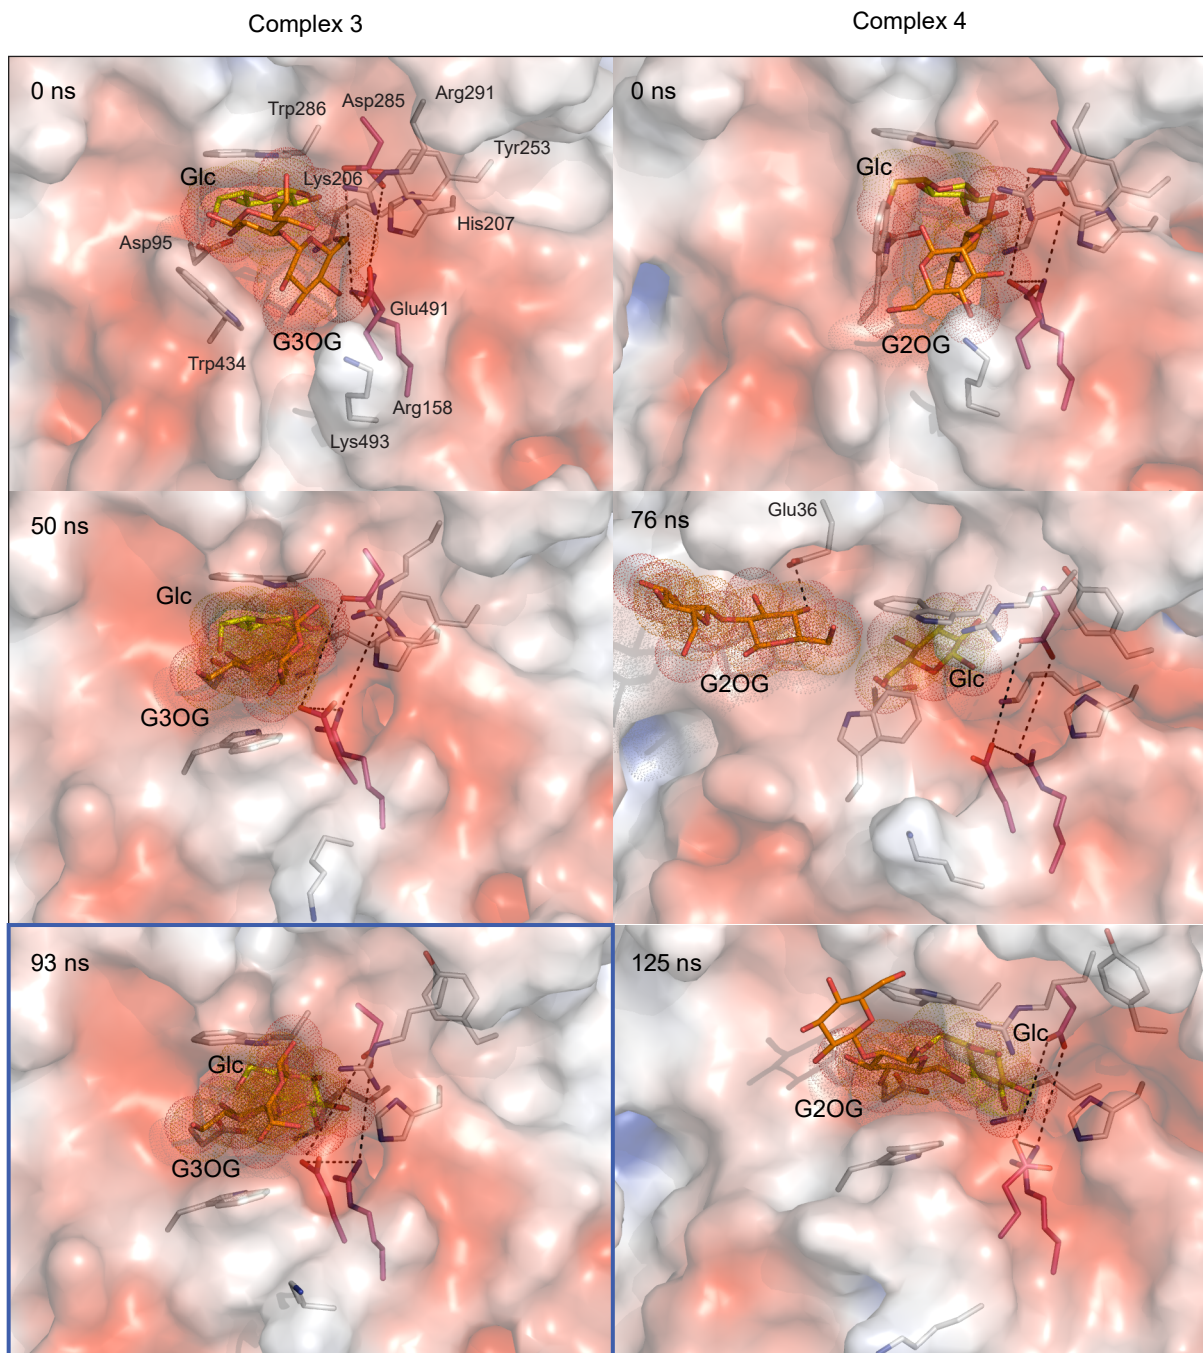

**Supplementary Figure 8. Ternary HvExoI:Glc:G3OG complex 3 (left) and HvExoI:Glc:G2OG complex 4 (right) along MD simulations after docking.**

Selected residues (carbons: grey sticks), Glc in the -1 subsite (carbons: yellow sticks) and G3OG or G2OG (carbons: orange sticks) are shown. Glc, G3OG and G2OG molecules are shown with dots indicating van der Waals radii. Molecular surface morphologies are coloured by electrostatic potentials: white, neutral; blue, +5 kT·e-1; red, -5 kT·e-1. The frame highlighted in blue was used for PELE calculations to investigate the Glc displacement pathway. Structures in top to bottom panels were superposed ( $C\alpha$  carbon atoms of 603 residues) with RMSD values between 0.982 and 1.021 Å (complex 3), and 0.819 and 0.973 Å (complex 4). Arg158-Glu491-Asp285 (carbons: purple sticks) toll-like barriers (dashed lines) are shown. Residues are marked in top left panel only.

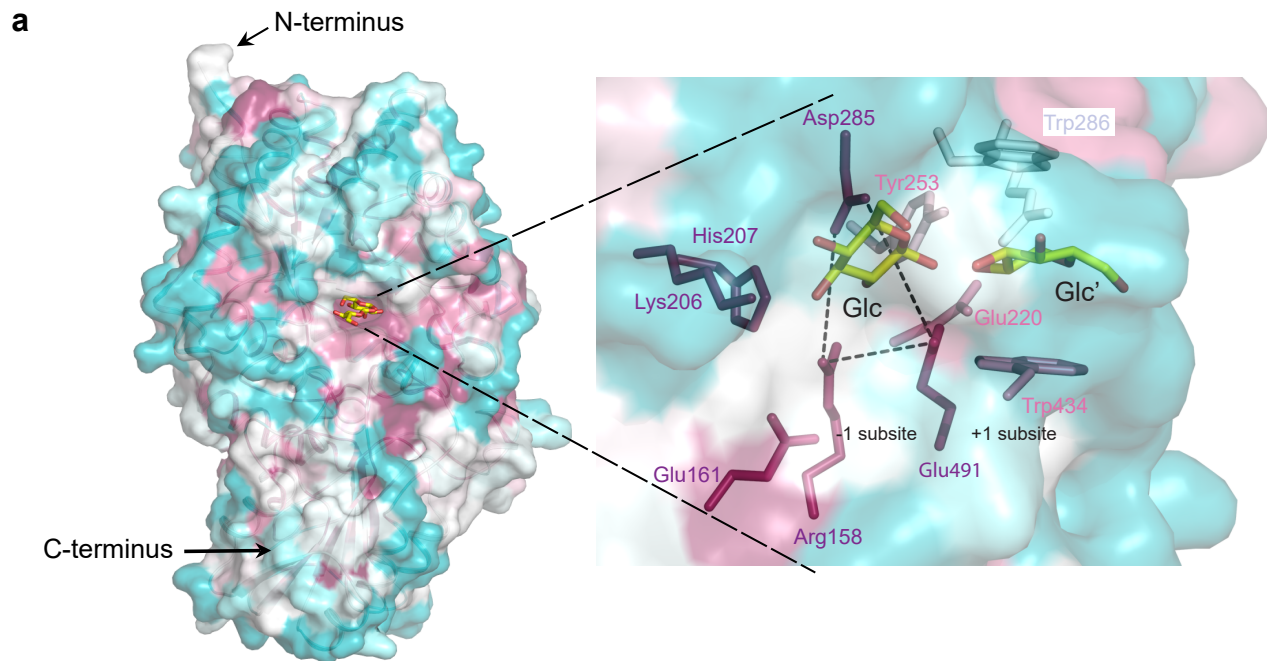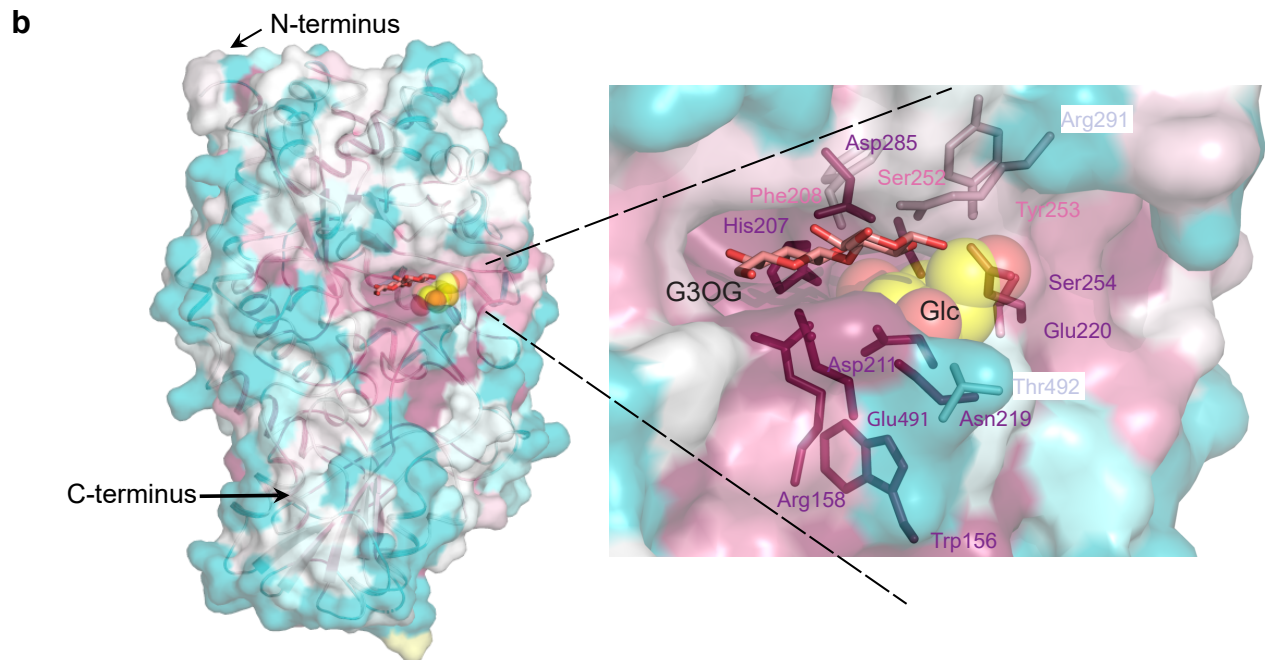

**c** AAR    CIC    Variation in the active site:    AAR    CIC    Variation in the lateral cavity:

|        |     |                                       |        |     |                                    |
|--------|-----|---------------------------------------|--------|-----|------------------------------------|
| Arg158 | 9,9 | R, G                                  | Trp156 | 9,9 | W, Y                               |
| Glu161 | 9,9 | E, R                                  | Phe208 | 7,6 | V, W, F, Y, L                      |
| Lys206 | 9,9 | K                                     | Asp211 | 9,9 | D, Y, E, G, T, L                   |
| His207 | 9,9 | H, Q                                  | Asn219 | 9,9 | S, E, D, N                         |
| Glu220 | 9,8 | E, R, T, Q, S, A, G, H                | Ser252 | 9,9 | G, A, N, S, T, C, D                |
| Tyr253 | 7,6 | H, S, F, L, Y                         | Ser254 | 9,8 | S, G, T, A, N, H,                  |
| Asp285 | 9,9 | E, N, D                               | Thr492 | 4,3 | V, T, S, G, I, H, N, R, Y, W, M, F |
| Trp286 | 6,5 | Y, M, E, R, F, W, A, S                |        |     |                                    |
| Arg291 | 6,5 | H, G, S, Q, L, N, E, K, M, R, F, D, T |        |     |                                    |
| Trp434 | 9,8 | W, G, M, K, R, H                      |        |     |                                    |
| Glu491 | 9,9 | E, D                                  |        |     |                                    |

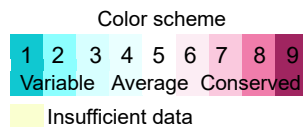

AAR - Amino acid residue

CIC - Confidence interval colour

Residue conservation - 500 sequences with 35-95% sequence identity to HvExol identified by ProMals3D were analysed.

**Supplementary Figure 9. Conservation of amino acid residues (AAR) in HvExo1 classified in the GH3 family<sup>3</sup>.**

**a**, Conservation of surface residues of the HvExoI structure (left) (PDB 3WLH), and a detail of the active site with 11 residues (right; sticks coloured by confidence interval colour - CIC). **b**, Conservation of surface residues of the HvExoI:G3OG complex (left) (*cf.* **Fig. 6h**), and a detail of the lateral cavity with 14 residues (right; sticks coloured by CIC). **c**, Conservation scores<sup>4</sup> of residues in the active site (left), and in the lateral cavity (right). Scales of conservation represent the lower and upper bounds of intervals, where burgundy and turquoise are the extremes of conservation on the scale 9=conserved and 1=variable, respectively. The HvExoI structure (PDB 3WLH) was used as a search parameter to identify 500 sequences with 35-95% sequence identity to the HvExo1 sequence, amongst them putative pro- and eukaryotic entries.



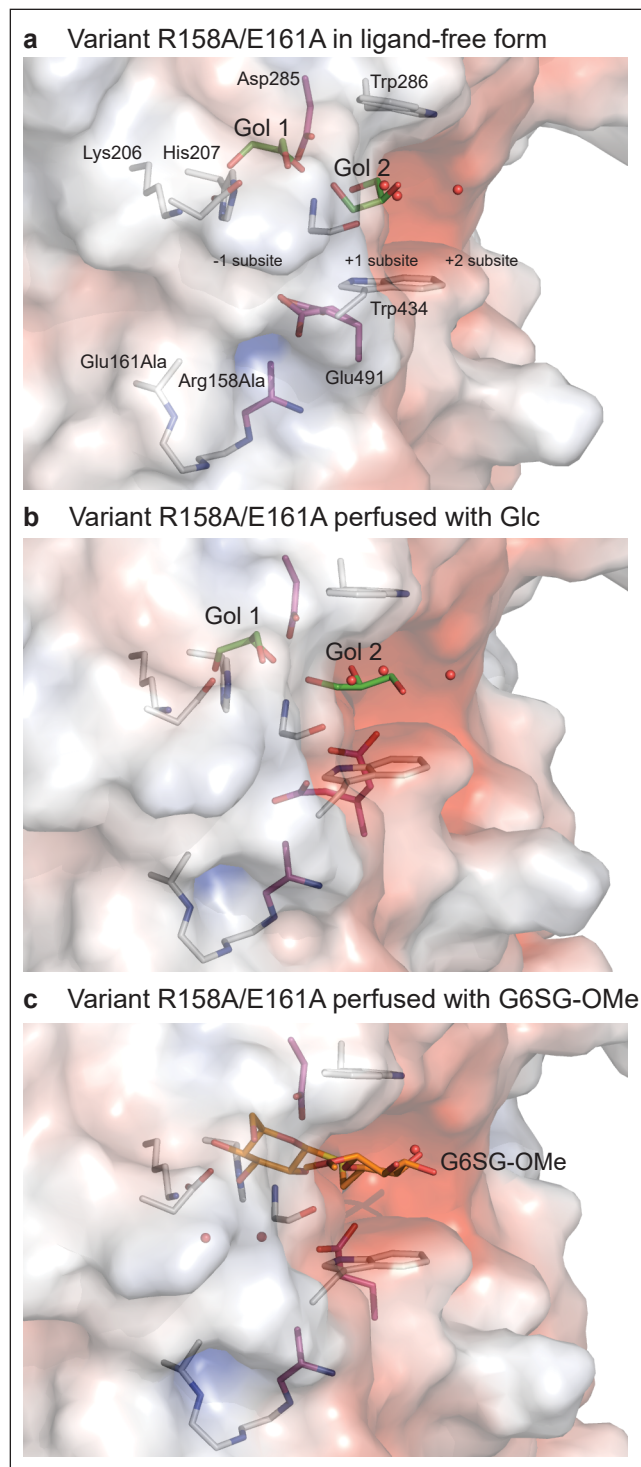

**Supplementary Figure 10. Variant R158A/E161A HvExoI in a ligand-free form, and with perfused Glc or G6SG-OMe.**

**a**, Ligand-free form of the R158A/E161A variant. Two glycerol molecules (carbons: green sticks) at 1.0 occupancies are bound in the -1 and +1 subsites. **b**, R158A/E161A perfused with Glc, which failed to bind; instead two glycerol molecules at 1.0 occupancies bound in the -1 and +1 subsites. **c**, R158A/E161A with bound G6SG-OMe (carbons: orange sticks) at 1.0 occupancy across the -1 and +1 subsites. Molecular surface morphologies are coloured by electrostatic potentials: white, neutral; blue, +5 kT·e-1; red, -5 kT·e-1. Grey, red, and blue represent carbon, oxygen and nitrogen atoms, respectively. Water molecules are shown as red spheres. Residues are marked in top panel only.

**Supplementary Table 1. Chemical structures of reaction intermediates during organic synthesis, and chemical structures of ligands and inhibitors used in this work.**

| Compound                                                                                             | Chemical structure                                                                    |
|------------------------------------------------------------------------------------------------------|---------------------------------------------------------------------------------------|
| <i>Intermediate</i>                                                                                  |                                                                                       |
| Methyl 6-thio- $\beta$ -gentiobioside heptaacetate                                                   | 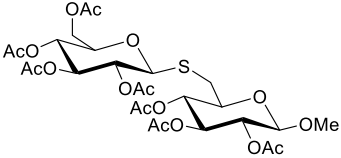    |
| Methyl 3,4,6-tri- <i>O</i> -acetyl-2- <i>O</i> -trifluoromethanesulfonyl- $\beta$ -D-mannopyranoside |    |
| Methyl 2-thio- $\beta$ -sophoroside heptaacetate                                                     |    |
| <i>Ligand / inhibitor</i>                                                                            |                                                                                       |
| Glc (D-glucose)                                                                                      |  |
| G6SG-OMe (methyl 6-thio- $\beta$ -gentiobioside)                                                     |   |
| 3dGlc (3-deoxy-D-glucose)                                                                            |  |
| 4dGlc (4-deoxy-D-glucose)                                                                            |  |
| Octyl-O-Glc (n-octyl $\beta$ -D-glucopyranoside)                                                     |  |
| Octyl-S-Glc (n-octyl 1-thio- $\beta$ -D-glucopyranoside)                                             |  |
| G2SG-OMe (methyl 2-thio- $\beta$ -sophoroside)                                                       |  |

**Supplementary Table 2. H-bonds of Glc with the protein or G2OG at representative points along the displacement pathway calculated by PELE for complex 1.**

Separations from the Glc geometric centre in the -1 subsite are given. The analysis was performed with the FindHBond option of UCSFChimera, which uses a set of geometric criteria that consider different donor-acceptor combinations and are based on a survey of small-molecule crystal structures<sup>5</sup>.

| Donor                 | Acceptor   | Hydrogen    | D---A dist. (Å) | D-H---A dist. (Å) |
|-----------------------|------------|-------------|-----------------|-------------------|
| Separations ~ 2-3 Å   |            |             |                 |                   |
| ARG158 NH1            | GLC O2     | ARG158 HH12 | 2.777           | 1.792             |
| ARG158 NH2            | GLC O3     | ARG158 HH22 | 3.143           | 2.204             |
| LYS206 NZ             | GLC O4     | LYS206 HZ1  | 2.915           | 1.908             |
| G2OG O12              | GLC O1     | G2OG HO7    | 3.205           | 2.419             |
| G2OG O12              | GLC O5     | G2OG HO7    | 2.895           | 1.997             |
| GLC O1                | ASP285 OD2 | GLC HO1     | 2.61            | 1.67              |
| GLC O2                | ASP285 OD1 | GLC HO2     | 2.768           | 1.938             |
| GLC O3                | HIS207 NE2 | GLC HO3     | 2.919           | 1.973             |
| GLC O4                | ASP95 OD1  | GLC HO4     | 2.801           | 1.915             |
| GLC O6                | ASP95 OD1  | GLC HO6     | 2.922           | 2.056             |
| GLC O6                | ASP95 OD2  | GLC HO6     | 3.029           | 2.3               |
| Separations ~ 5-7 Å   |            |             |                 |                   |
| TRP286 N              | GLC O4     | TRP286 H    | 3.236           | 2.228             |
| ARG291 NH1            | GLC O6     | ARG291 HH12 | 3.228           | 2.333             |
| G2OG O4               | GLC O6     | G2OG HO4    | 2.741           | 1.81              |
| GLC O1                | ASN219 OD1 | GLC HO1     | 3.303           | 2.819             |
| GLC O3                | HIS207 NE2 | GLC HO3     | 2.828           | 1.862             |
| Separations ~ 8-11 Å  |            |             |                 |                   |
| TRP156 NE1            | GLC O1     | TRP156 HE1  | 2.946           | 2.101             |
| GLU220 N              | GLC O5     | GLU220 H    | 3.373           | 2.511             |
| TYR253 N              | GLC O4     | TYR253 H    | 2.922           | 1.946             |
| GLC O1                | ASP211 O   | GLC HO1     | 3.198           | 2.235             |
| GLC O2                | ASP211 OD1 | GLC HO2     | 2.683           | 1.737             |
| GLC O2                | ASP211 OD2 | GLC HO2     | 2.944           | 2.206             |
| GLC O4                | ASP285 OD2 | GLC HO4     | 2.735           | 1.994             |
| GLC O6                | ASN219 OD1 | GLC HO6     | 2.703           | 1.745             |
| Separations ~ 13-17 Å |            |             |                 |                   |
| ASN219 ND2            | GLC O6     | ASN219 HD21 | 2.965           | 2.037             |
| GLC O3                | GLU220 OE2 | GLC HO3     | 3.192           | 2.493             |
| GLC O6                | GLU491 O   | GLC HO6     | 2.764           | 1.849             |

**Supplementary Table 3. H-bonds of Glc with the protein or G2OG at representative points along the displacement pathway calculated by PELE for complex 2.**

Separations from the Glc geometric centre in the -1 subsite are given. The analysis was performed with the FindHBond option of UCSFChimera, which uses a set of geometric criteria that consider different donor-acceptor combinations and are based on a survey of small-molecule crystal structures<sup>5</sup>.

| Donor                   |     | Acceptor |     | Hydrogen |      | D---A dist.<br>(Å) | D-H---A dist.<br>(Å) |
|-------------------------|-----|----------|-----|----------|------|--------------------|----------------------|
| Separation<br>~ 2-3 Å   |     |          |     |          |      |                    |                      |
| G2OG                    | O10 | GLC      | O6  | G2OG     | HO5  | 2.867              | 1.933                |
| G2OG                    | O8  | GLC      | O1  | G2OG     | HO8  | 2.88               | 1.92                 |
| G2OG                    | O9  | GLC      | O5  | G2OG     | HO9  | 2.814              | 1.854                |
| GLC                     | O2  | ASP285   | OD2 | GLC      | HO2  | 2.89               | 1.931                |
| GLC                     | O3  | HIS207   | NE2 | GLC      | HO3  | 2.98               | 2.13                 |
| GLC                     | O4  | ASP95    | OD1 | GLC      | HO4  | 2.518              | 1.58                 |
| GLC                     | O4  | ASP95    | OD2 | GLC      | HO4  | 3.273              | 2.566                |
| GLC                     | O6  | ASP95    | OD2 | GLC      | HO6  | 2.564              | 1.624                |
| ARG158                  | NH1 | GLC      | O2  | ARG158   | HH11 | 3.085              | 2.152                |
| ARG158                  | NH2 | GLC      | O3  | ARG158   | HH22 | 3.221              | 2.355                |
| LYS206                  | NZ  | GLC      | O3  | LYS206   | HZ2  | 2.741              | 1.756                |
| Separation<br>~ 5-7 Å   |     |          |     |          |      |                    |                      |
| GLC                     | O1  | ASP285   | OD1 | GLC      | HO1  | 2.876              | 2.063                |
| GLC                     | O1  | TRP286   | O   | GLC      | HO1  | 3.165              | 2.643                |
| GLC                     | O2  | ASP285   | OD2 | GLC      | HO2  | 2.529              | 1.562                |
| ARG158                  | NH1 | GLC      | O3  | ARG158   | HH11 | 3.251              | 2.413                |
| ARG158                  | NH2 | GLC      | O3  | ARG158   | HH22 | 3.330              | 2.503                |
| TRP286                  | N   | GLC      | O2  | TRP286   | H    | 3.192              | 2.259                |
| ARG291                  | NH2 | GLC      | O1  | ARG291   | HH22 | 2.879              | 1.863                |
| GLU491                  | OE2 | GLC      | O4  | GLU491   | HE2  | 2.568              | 1.612                |
| THR492                  | OG1 | GLC      | O6  | THR492   | HG1  | 2.835              | 1.923                |
| Separation<br>~ 8-11 Å  |     |          |     |          |      |                    |                      |
| G2OG                    | O8  | GLC      | O1  | G2OG     | HO8  | 2.892              | 1.916                |
| G2OG                    | O8  | GLC      | O5  | G2OG     | HO8  | 2.881              | 2.261                |
| GLC                     | O1  | G2OG     | O9  | GLC      | HO1  | 2.679              | 1.72                 |
| GLC                     | O2  | ASP285   | OD2 | GLC      | HO2  | 2.725              | 1.774                |
| GLC                     | O6  | G2OG     | O8  | GLC      | HO6  | 3.335              | 2.374                |
| THR492                  | OG1 | GLC      | O4  | THR492   | HG1  | 2.708              | 1.796                |
| Separation<br>~ 13-17 Å |     |          |     |          |      |                    |                      |
| GLC                     | O1  | G2OG     | O4  | GLC      | HO1  | 2.765              | 1.819                |
| GLC                     | O4  | GLC      | O6  | GLC      | HO4  | 2.803              | 1.938                |
| LYS493                  | NZ  | GLC      | O2  | LYS493   | HZ2  | 3.007              | 2.142                |

**Supplementary Table 4. H-bonds of Glc with the protein or G3OG at representative points along the displacement pathway calculated by PELE for complex 3.**

Separations from the Glc geometric centre in the -1 subsite are given. The analysis was performed with the FindHBond option of UCSFChimera, which uses a set of geometric criteria that consider different donor-acceptor combinations and are based on a survey of small-molecule crystal structures<sup>5</sup>.

| Donor                    |     | Acceptor |     | Hydrogen |      | D---A dist.<br>(Å) | D-H---A dist.<br>(Å) |
|--------------------------|-----|----------|-----|----------|------|--------------------|----------------------|
| Separations<br>~ 2-3 Å   |     |          |     |          |      |                    |                      |
| ARG158                   | NH1 | GLC      | O2  | ARG158   | HH12 | 3.002              | 2.033                |
| ARG158                   | NH2 | GLC      | O3  | ARG158   | HH22 | 3.008              | 2.057                |
| LYS206                   | NZ  | GLC      | O3  | LYS206   | HZ1  | 3.121              | 2.253                |
| LYS206                   | NZ  | GLC      | O4  | LYS206   | HZ1  | 3.224              | 2.408                |
| TRP286                   | N   | GLC      | O1  | TRP286   | H    | 3.303              | 2.326                |
| GLC                      | O1  | ASP285   | OD1 | GLC      | HO1  | 3.137              | 2.468                |
| GLC                      | O1  | ASP285   | OD2 | GLC      | HO1  | 2.689              | 1.899                |
| GLC                      | O2  | ASP285   | OD1 | GLC      | HO2  | 2.632              | 1.675                |
| GLC                      | O4  | ASP95    | OD1 | GLC      | HO4  | 2.566              | 1.629                |
| GLC                      | O6  | ASP95    | OD2 | GLC      | HO6  | 2.618              | 1.684                |
| Separations<br>~ 5-7 Å   |     |          |     |          |      |                    |                      |
| TRP286                   | N   | GLC      | O6  | TRP286   | H    | 2.804              | 1.8                  |
| G3OG                     | O2  | GLC      | O1  | G3OG     | H4   | 2.964              | 2.114                |
| G3OG                     | O2  | GLC      | O5  | G3OG     | H4   | 3.351              | 2.567                |
| G3OG                     | O3  | GLC      | O5  | G3OG     | H6   | 2.729              | 1.853                |
| GLC                      | O3  | ASN219   | OD1 | GLC      | HO3  | 2.704              | 1.805                |
| Separations<br>~ 8-11 Å  |     |          |     |          |      |                    |                      |
| SER252                   | OG  | GLC      | O2  | SER252   | HG   | 2.76               | 1.829                |
| TYR253                   | N   | GLC      | O1  | TYR253   | H    | 3.06               | 2.173                |
| ARG291                   | NH1 | GLC      | O6  | ARG291   | HH11 | 2.903              | 2.103                |
| GLC                      | O2  | ASP285   | OD1 | BGC      | HO2  | 3.326              | 2.516                |
| GLC                      | O2  | ASP285   | OD2 | BGC      | HO2  | 2.76               | 1.84                 |
| Separations ~<br>13-17 Å |     |          |     |          |      |                    |                      |
| G3OG                     | O2  | GLC      | O2  | G3OG     | H4   | 2.768              | 1.827                |
| GLC                      | O1  | THR492   | OG1 | GLC      | HO1  | 2.777              | 1.824                |
| GLC                      | O3  | GLU491   | OE1 | GLC      | HO3  | 2.895              | 2.04                 |
| GLC                      | O6  | GLU220   | OE1 | GLC      | HO6  | 2.952              | 2.054                |
| Separations ~<br>13-17 Å |     |          |     |          |      |                    |                      |
| ALA296                   | N   | GLC      | O6  | ALA296   | H    | 2.883              | 1.907                |
| G3OG                     | O6  | GLC      | O3  | G3OG     | H13  | 2.796              | 1.867                |
| GLC                      | O1  | GLU220   | OE1 | GLC      | HO1  | 2.852              | 1.988                |
| GLC                      | O2  | GLU220   | OE1 | GLC      | HO2  | 2.815              | 1.921                |
| GLC                      | O3  | G3OG2    | O8  | GLC      | HO3  | 2.751              | 1.901                |

**Supplementary Table 5. Parameters of 22 crystal structures of native HvExoI with entrapped Glc and in complex with ligands, and recombinant WT and variant HvExoI in apo-forms and in complex with ligands.**

| PDB accession                            | HvExoI      | Ligand soaked <sup>a</sup> | Ligand bound at subsite <sup>b</sup> |     | a=b <sup>d</sup><br>Å | c <sup>d</sup><br>Å | Reference |
|------------------------------------------|-------------|----------------------------|--------------------------------------|-----|-----------------------|---------------------|-----------|
|                                          |             |                            | -1                                   | +1  |                       |                     |           |
| Native HvExoI                            |             |                            |                                      |     |                       |                     |           |
| 3WLH                                     | WT          | none                       | Glc ↔ Glc <sup>c</sup>               |     | 101.02                | 182.06              | This work |
| 3WLJ                                     | WT          | 3dGlc                      | Glc 3dGlc                            |     | 100.82                | 181.65              | This work |
| 3WLK                                     | WT          | 4dGlc                      | Glc empty                            |     | 100.56                | 181.76              | This work |
| 3WLL                                     | WT          | PEG400                     | empty PEG                            |     | 100.27                | 181.70              | This work |
| 3WLM                                     | WT          | octyl-O-Glc                | Octyl-O-Glc                          |     | 101.02                | 180.80              | This work |
| 3WLN                                     | WT          | octyl-S-Glc                | Octyl-S-Glc                          |     | 100.70                | 181.88              | This work |
| Recombinant HvExoI                       |             |                            |                                      |     |                       |                     |           |
| 3WLI                                     | WT          | none                       | Gol                                  | Gol | 99.22                 | 183.46              | This work |
| 3WLO                                     | WT          | Glc                        | Glc                                  | Glc | 100.16                | 183.01              | This work |
| 3WLP                                     | WT          | G6SG-OMe                   | G6SG-OMe                             |     | 99.94                 | 182.87              | This work |
| 6MD6                                     | WT          | G2SG-OMe                   | G2SG-OMe                             |     | 100.31                | 182.15              | This work |
| 3WLQ                                     | R158A/E161A | none                       | Gol                                  | Gol | 100.78                | 183.29              | This work |
| 3WLR                                     | R158A/E161A | Glc                        | Gol                                  | Gol | 100.69                | 183.45              | This work |
| 6MI1                                     | R158A/E161A | G6SG-OMe                   | G6SG-OMe                             |     | 101.72                | 182.08              | This work |
| Other HvExoI structures deposited in PDB |             |                            |                                      |     |                       |                     |           |
| 1EX1                                     | WT          | none                       | Glc                                  |     | 102.09                | 184.50              | 6         |
| 1IEQ                                     | WT          | Glc                        | Glc                                  |     | 100.95                | 181.20              | 7         |
| 1IEV                                     | WT          | conduritol B epoxide       | hexitol                              |     | 101.01                | 181.55              | 7         |
| 1IEW                                     | WT          | DNP-2d-2F-Glc              | 2d-2F-Glc                            |     | 100.96                | 181.25              | 7         |
| 1IEX                                     | WT          | G4SG4OG4SG4OG4SG           | G4SGO                                |     | 102.42                | 185.48              | 7         |
| 1J8V                                     | WT          | G3SGOG-4NP                 | G3SGO                                |     | 100.53                | 181.96              | 1         |
| 1LQ2                                     | WT          | PheGlcIm                   | PheGlcIm                             |     | 100.69                | 182.68              | 8         |
| 1X38                                     | WT          | PheGlcIm                   | PheGlcIm                             |     | 100.55                | 182.41              | 9         |
| 1X39                                     | WT          | AmGlcIm                    | AmGlcIm                              |     | 99.99                 | 184.39              | 9         |

<sup>a</sup> 3-Deoxy-glucose (3dGlc), 4-deoxy-glucose (4dGlc), polyethylene glycol 400 (PEG400), n-octyl-O-β-D-glucopyranoside (octyl-O-Glc), n-octyl-1-thio-β-D-glucopyranoside (octyl-S-Glc), glucose (Glc), methyl 6-thio-β-gentiobioside (G6SG-OMe), methyl 2-thio-β-sophoroside (G2SG-OMe), conduritol B epoxide, 2,4-dinitrophenyl 2-deoxy-2-fluoro β-D-glucopyranoside (DNP-2d-2F-Glc), 4<sup>I</sup>, 4<sup>III</sup>, 4<sup>V</sup>-S-trithiocellohexaose (G4SG4OG4SG4OG4SG), 4-nitrophenyl S-(β-D-glucopyranosyl)-(1,3)-(3-thio-β-D-glucopyranosyl)-(1,3)-β-D-glucopyranoside (G3SG3OG-4NP), glucophenyl imidazole (PheGlcIm), anilinomethyl glucoimidazole (AmGlcIm).

<sup>b</sup> When identified, PEG400 and glycerol molecules were not assigned to -1 and +1 subsites, except 3WLL, 3WLI, 3WLQ and 3WLR.

<sup>c</sup> Glc oscillates between -1 and +1 subsites.

<sup>d</sup> Tetragonal P4<sub>3</sub>2<sub>1</sub>2 unit cell angles α, β, and γ were 90 degrees.

**Supplementary Table 6. List of primers used to construct the R158A/E161A variant of HvExoI for heterologous expression in *P. pastoris*.**

---

| Variant <sup>a</sup> | Sequences (5' to 3') and notes <sup>b</sup>                                                                                                                       |
|----------------------|-------------------------------------------------------------------------------------------------------------------------------------------------------------------|
| R158A/E161A          | F:GAGATCCAAGATGGGGT <i>GCT</i> TGTTACG <i>CTT</i> CTTACTCTGAAGATAGAAG<br>AATTGT<br>R:ACAATCTTCTATCTTCAGAGTAAGA <i>AG</i> CGTAACA <i>AGC</i> ACCCCATCTTG<br>GATCTC |

---

<sup>a</sup> DNA fusion was sequenced in both directions and was identified to be correct.

<sup>b</sup> F and R indicate forward and reverse primers, respectively. Mutations are highlighted in red italics.

**Supplementary Table 7. Data collection and refinement statistics of crystal structures of native HvExoI with entrapped Glc and in complex with 3dGlc and 4dGlc.**

|                                                     | With trapped Glc                 | 3dGlc                            | 4dGlc                            |
|-----------------------------------------------------|----------------------------------|----------------------------------|----------------------------------|
| <b>Data collection</b>                              |                                  |                                  |                                  |
| Space group                                         | P4 <sub>3</sub> 2 <sub>1</sub> 2 | P4 <sub>3</sub> 2 <sub>1</sub> 2 | P4 <sub>3</sub> 2 <sub>1</sub> 2 |
| Cell dimensions                                     |                                  |                                  |                                  |
| <i>a, b, c</i> (Å)                                  | 101.02,<br>101.02,<br>182.06     | 100.82,<br>100.82,<br>181.65     | 100.56,<br>100.56,<br>181.76     |
| $\alpha, \beta, \gamma$ (°)                         | 90.00,<br>90.00,<br>90.00        | 90.00,<br>90.00,<br>90.00        | 90.00,<br>90.00,<br>90.00        |
| Resolution (Å)*                                     | 31.94-1.65<br>(1.69-1.65)        | 34.18-1.67<br>(1.72-1.67)        | 88.05-1.80<br>(1.86-1.80)        |
| <i>R</i> <sub>merge</sub>                           | 8.9                              | 5.2                              | 9.3                              |
| <i>I</i> / $\sigma I$ *                             | 34.1 (1.0)                       | 57.8 (2.7)                       | 28.0 (1.3)                       |
| Completeness (%)*                                   | 98.5 (92.5)                      | 99.0 (94.7)                      | 99.5 (93.4)                      |
| Redundancy                                          | 13                               | 13                               | 14                               |
| <b>Refinement</b>                                   |                                  |                                  |                                  |
| Resolution (Å)*                                     | 31.94-1.65<br>(1.69-1.65)        | 34.18-1.67<br>(1.72-1.67)        | 88.05-1.80<br>(1.86-1.80)        |
| No. reflections                                     | 106290                           | 101919                           | 82,188                           |
| <i>R</i> <sub>work</sub> / <i>R</i> <sub>free</sub> | 16.1/19.3                        | 15.9/18.5                        | 15.0/17.4                        |
| <b>No. atoms</b>                                    |                                  |                                  |                                  |
| Protein                                             | 4,606                            | 4,610                            | 4,789                            |
| Ligand/ion                                          | 24                               | 23                               | 12                               |
| Water                                               | 826                              | 830                              | 875                              |
| <b>B-factors</b>                                    |                                  |                                  |                                  |
| Protein                                             | 22.7                             | 22.3                             | 38.8                             |
| Ligand/ion                                          | 32.4                             | 34.4                             | 31.3                             |
| Water                                               | 40.1                             | 41.3                             | 44.3                             |
| <b>R.m.s. deviations</b>                            |                                  |                                  |                                  |
| Bond lengths (Å)                                    | 0.018                            | 0.013                            | 0.013                            |
| Bond angles (°)                                     | 1.587                            | 1.408                            | 1.327                            |

\* Values in parentheses are for highest-resolution shell.



**Supplementary Table 8. Data collection and refinement statistics of crystal structures of native HvExoI in complex with PEG400, octyl-O-Glc and octyl-S-glucoside.**

|                                                     | PEG400                           | Octyl-O-Glc                      | Octyl-S-Glc                      |
|-----------------------------------------------------|----------------------------------|----------------------------------|----------------------------------|
| <b>Data collection</b>                              |                                  |                                  |                                  |
| Space group                                         | P4 <sub>3</sub> 2 <sub>1</sub> 2 | P4 <sub>3</sub> 2 <sub>1</sub> 2 | P4 <sub>3</sub> 2 <sub>1</sub> 2 |
| Cell dimensions                                     |                                  |                                  |                                  |
| <i>a</i> , <i>b</i> , <i>c</i> (Å)                  | 100.27,<br>100.27,<br>181.70     | 101.02,<br>101.02,<br>180.80     | 100.70,<br>100.70,<br>181.88     |
| $\alpha$ , $\beta$ , $\gamma$ (°)                   | 90.00,<br>90.00,<br>90.00        | 90.00,<br>90.00,<br>90.00        | 90.00,<br>90.00,<br>90.00        |
| Resolution (Å)*                                     | 87.71-1.80<br>(1.85-1.80)        | 42.26-1.90<br>(1.95-1.90)        | 88.05-2.00<br>(2.05-2.00)        |
| <i>R</i> <sub>merge</sub>                           | 10.1                             | 20.4                             | 16.7                             |
| <i>I</i> / $\sigma I$ *                             | 14.9 (1.1)                       | 10.1 (1.0)                       | 12.0 (1.3)                       |
| Completeness (%)*                                   | 99.2 (97.4)                      | 100 (99.5)                       | 99.9 (98.7)                      |
| Redundancy                                          | 6                                | 12                               | 14                               |
| <b>Refinement</b>                                   |                                  |                                  |                                  |
| Resolution (Å)*                                     | 87.71-1.80<br>(1.85-1.80)        | 42.26-1.90<br>(1.95-1.90)        | 88.05-2.00<br>(2.05-2.00)        |
| No. reflections                                     | 81,336                           | 70,533                           | 60,745                           |
| <i>R</i> <sub>work</sub> / <i>R</i> <sub>free</sub> | 16.1/19.1                        | 17.0/20.1                        | 16.9/20.5                        |
| No. atoms                                           |                                  |                                  |                                  |
| Protein                                             | 4,566                            | 4,586                            | 4,590                            |
| Ligand/ion                                          | -                                | 20                               | 20                               |
| Water                                               | 883                              | 870                              | 901                              |
| <i>B</i> -factors                                   |                                  |                                  |                                  |
| Protein                                             | 33.6                             | 33.2                             | 40.3                             |
| Ligand/ion                                          | -                                | 34.5                             | 48.2                             |
| Water                                               | 46.2                             | 42.6                             | 43.6                             |
| R.m.s. deviations                                   |                                  |                                  |                                  |
| Bond lengths (Å)                                    | 0.011                            | 0.010                            | 0.011                            |
| Bond angles (°)                                     | 1.253                            | 1.266                            | 1.372                            |

\* Values in parentheses are for highest-resolution shell.

**Supplementary Table 9. Data collection and refinement statistics of crystal structures of recombinant WT HvExoI in a ligand-free form and in complex with Glc, G6SG-OMe and G2SG-OMe.**

|                                                     | Ligand-free                      | Glc                              | G6SG-OMe                         | G2SG-OMe                         |
|-----------------------------------------------------|----------------------------------|----------------------------------|----------------------------------|----------------------------------|
| Data collection                                     |                                  |                                  |                                  |                                  |
| Space group                                         | P4 <sub>3</sub> 2 <sub>1</sub> 2 | P4 <sub>3</sub> 2 <sub>1</sub> 2 | P4 <sub>3</sub> 2 <sub>1</sub> 2 | P4 <sub>3</sub> 2 <sub>1</sub> 2 |
| Cell dimensions                                     |                                  |                                  |                                  |                                  |
| <i>a</i> , <i>b</i> , <i>c</i> (Å)                  | 99.22,<br>99.22,<br>183.46       | 100.16,<br>100.16,<br>183.01     | 99.94,<br>99.94,<br>182.87       | 100.31,<br>100.31,<br>182.15     |
| $\alpha$ , $\beta$ , $\gamma$ (°)                   | 90.00,<br>90.00,<br>90.00        | 90.00,<br>90.00,<br>90.00        | 90.00,<br>90.00,<br>90.00        | 90.00,<br>90.00,<br>90.00        |
| Resolution (Å)*                                     | 87.27-1.45<br>(1.49-1.45)        | 87.86-1.55<br>(1.59-1.55)        | 25.41-1.57<br>(1.61-1.57)        | 46.13-1.68<br>(1.72-1.68)        |
| <i>R</i> <sub>merge</sub>                           | 6.3                              | 12.4                             | 5.5                              | 7.6                              |
| <i>I</i> / $\sigma$ <i>I</i> *                      | 60.0 (2.3)                       | 49.0 (1.8)                       | 68.4 (6.6)                       | 39.2 (4.0)                       |
| Completeness (%)*                                   | 99.3 (99.5)                      | 99.5 (97.6)                      | 97.0 (99.2)                      | 99.9 (99.3)                      |
| Redundancy                                          | 26                               | 27                               | 28                               | 29                               |
| Refinement                                          |                                  |                                  |                                  |                                  |
| Resolution (Å)*                                     | 87.27-1.45<br>(1.49-1.45)        | 87.86-1.55<br>(1.59-1.55)        | 25.41-1.57<br>(1.61-1.57)        | 46.13-1.68<br>(1.72-1.68)        |
| No. reflections                                     | 152,633                          | 127,330                          | 118,576                          | 101,119                          |
| <i>R</i> <sub>work</sub> / <i>R</i> <sub>free</sub> | 14.6/16.3                        | 16.7/19.0                        | 16.2/18.1                        | 13.2/15.9                        |
| No. atoms                                           |                                  |                                  |                                  |                                  |
| Protein                                             | 4,664                            | 4,622                            | 4,626                            | 5,825                            |
| Ligand/ion                                          | -                                | 24                               | 24                               | 24                               |
| Water                                               | 894                              | 1025                             | 853                              | 1003                             |
| <i>B</i> -factors                                   |                                  |                                  |                                  |                                  |
| Protein                                             | 18.1                             | 20.1                             | 17.6                             | 19.4                             |
| Ligand/ion                                          | -                                | 19.4                             | 15.9                             | 36.2                             |
| Water                                               | 36.4                             | 37.5                             | 36.6                             | 38.4                             |
| R.m.s. deviations                                   |                                  |                                  |                                  |                                  |
| Bond lengths (Å)                                    | 0.019                            | 0.021                            | 0.016                            | 0.020                            |
| Bond angles (°)                                     | 1.753                            | 1.845                            | 1.761                            | 2.282                            |

\* Values in parentheses are for highest-resolution shell.

**Supplementary Table 10. Data collection and refinement statistics of crystal structures of the R158A/E161A HvExoI variant in the ligand-free form and in complex with Glc and G6SG-OMe.**

|                                                     | Ligand-free                      | Glc                              | G6SG-OMe                         |
|-----------------------------------------------------|----------------------------------|----------------------------------|----------------------------------|
| <b>Data collection</b>                              |                                  |                                  |                                  |
| Space group                                         | P4 <sub>3</sub> 2 <sub>1</sub> 2 | P4 <sub>3</sub> 2 <sub>1</sub> 2 | P4 <sub>3</sub> 2 <sub>1</sub> 2 |
| Cell dimensions                                     |                                  |                                  |                                  |
| <i>a, b, c</i> (Å)                                  | 100.78,<br>100.78,<br>183.16     | 100.69,<br>100.69,<br>183.29     | 101.72,<br>101.72,<br>183.45     |
| $\alpha, \beta, \gamma$ (°)                         | 90.00,<br>90.00,<br>90.00        | 90.00,<br>90.00,<br>90.00        | 90.00,<br>90.00,<br>90.00        |
| Resolution (Å)*                                     | 88.30-1.65<br>(1.69-1.65)        | 46.37-2.21<br>(2.26-2.21)        | 88.96-2.30<br>(2.36-2.30)        |
| <i>R</i> <sub>merge</sub>                           | 5.6                              | 16.7                             | 11.9                             |
| <i>I</i> / $\sigma I$ *                             | 58.7 (2.3)                       | 29.1 (2.4)                       | 30.1 (2.0)                       |
| Completeness (%)*                                   | 99.8 (98.3)                      | 98.8 (88.1)                      | 99.3 (99.5)                      |
| Redundancy                                          | 26                               | 25                               | 29                               |
| <b>Refinement</b>                                   |                                  |                                  |                                  |
| Resolution (Å)*                                     | 88.30-1.65<br>(1.69-1.65)        | 46.37-2.21<br>(2.26-2.21)        | 88.96-2.30<br>(2.36-2.30)        |
| No. reflections                                     | 107,601                          | 45,206                           | 41,138                           |
| <i>R</i> <sub>work</sub> / <i>R</i> <sub>free</sub> | 15.7/18.8                        | 16.9/17.2                        | 16.8/22.4                        |
| <b>No. atoms</b>                                    |                                  |                                  |                                  |
| Protein                                             | 4,626                            | 4,621                            | 4,598                            |
| Ligand/ion                                          | -                                | -                                | 24                               |
| Water                                               | 1005                             | 562                              | 330                              |
| <b>B-factors</b>                                    |                                  |                                  |                                  |
| Protein                                             | 24.7                             | 49.3                             | 36.2                             |
| Ligand/ion                                          | -                                | -                                | 50.3                             |
| Water                                               | 43.0                             | 58.1                             | 45.3                             |
| <b>R.m.s. deviations</b>                            |                                  |                                  |                                  |
| Bond lengths (Å)                                    | 0.020                            | 0.020                            | 0.019                            |
| Bond angles (°)                                     | 1.715                            | 1.716                            | 2.081                            |

\* Values in parentheses are for highest-resolution shell.

## Supplementary References

1. Hrmova, M., DeGori, R., Smith, B. J., Fairweather, J. K., Driguez, H. et al. Structural basis for a broad specificity in higher plant  $\beta$ -D-glucan glucohydrolases. *Plant Cell* **14**, 1-22 (2002).
2. Fernandez-Alonso, M. C., Canada, F. J., Jimenez-Barbero, J. & Cuevas, G. Molecular recognition of saccharides by proteins. Insights on the origin of the carbohydrate-aromatic interactions. *J. Am. Chem. Soc.* **127**, 7379-7386 (2005).
3. Lombard, V., Golaconda Ramulu, H., Drula, E., Coutinho, P. M. & Henrissat, B. The carbohydrate-active enzymes database (CAZy) in 2013. *Nucleic Acids Res.* **42D**, 490-495 (2014).
4. Celniker, G., Nimrod, G., Ashkenazy, H., Glaser, F., Martz, E. et al. ConSurf: using evolutionary data to raise testable hypotheses about protein function. *Isr. J. Chem.* **53**, 199-206 (2013).
5. Mills, J. E. & Dean, P. M. Three-dimensional hydrogen-bond geometry and probability information from a crystal survey. *J. Comput. Aided Mol. Des.* **10**, 607-622 (1966).
6. Mills, J. E. & Dean, P. M. Three-dimensional hydrogen-bond geometry and probability information from a crystal survey. *J. Comput. Aided Mol. Des.* **10**, 607-622 (1966).
7. Varghese, J. N., Hrmova, M. & Fincher, G. B. Three-dimensional structure of a barley  $\beta$ -D-glucan exohydrolase, a family 3 glycosyl hydrolase. *Structure* **7**, 179-190 (1999).
8. Hrmova, M., Varghese, J. N., DeGori, R., Smith, B. J., Driguez, H. et al. Catalytic mechanisms and reaction intermediates along the hydrolytic pathway of plant  $\beta$ -D-glucan glucohydrolase. *Structure* **9**, 1005-1016 (2001).
9. Hrmova, M., De Gori, R., Smith, B. J., Vasella, A., Varghese, J. N., et al. Three-dimensional structure of the barley  $\beta$ -D-glucan glucohydrolase in complex with a transition-state mimic. *J. Biol. Chem.* **279**, 4970-4980 (2004).
10. Hrmova, M., Streltsov, V. A., Smith, B. J., Vasella, A., Varghese, J. N. et al. Structural rationale for low nanomolar binding of transition state mimics to a family GH3  $\beta$ -D-glucan glucohydrolase from barley. *Biochemistry (USA)* **44**, 16529-16539 (2005).
